# Supplementary material
Source: PubMed Central journal article supplement (PMC7956231)

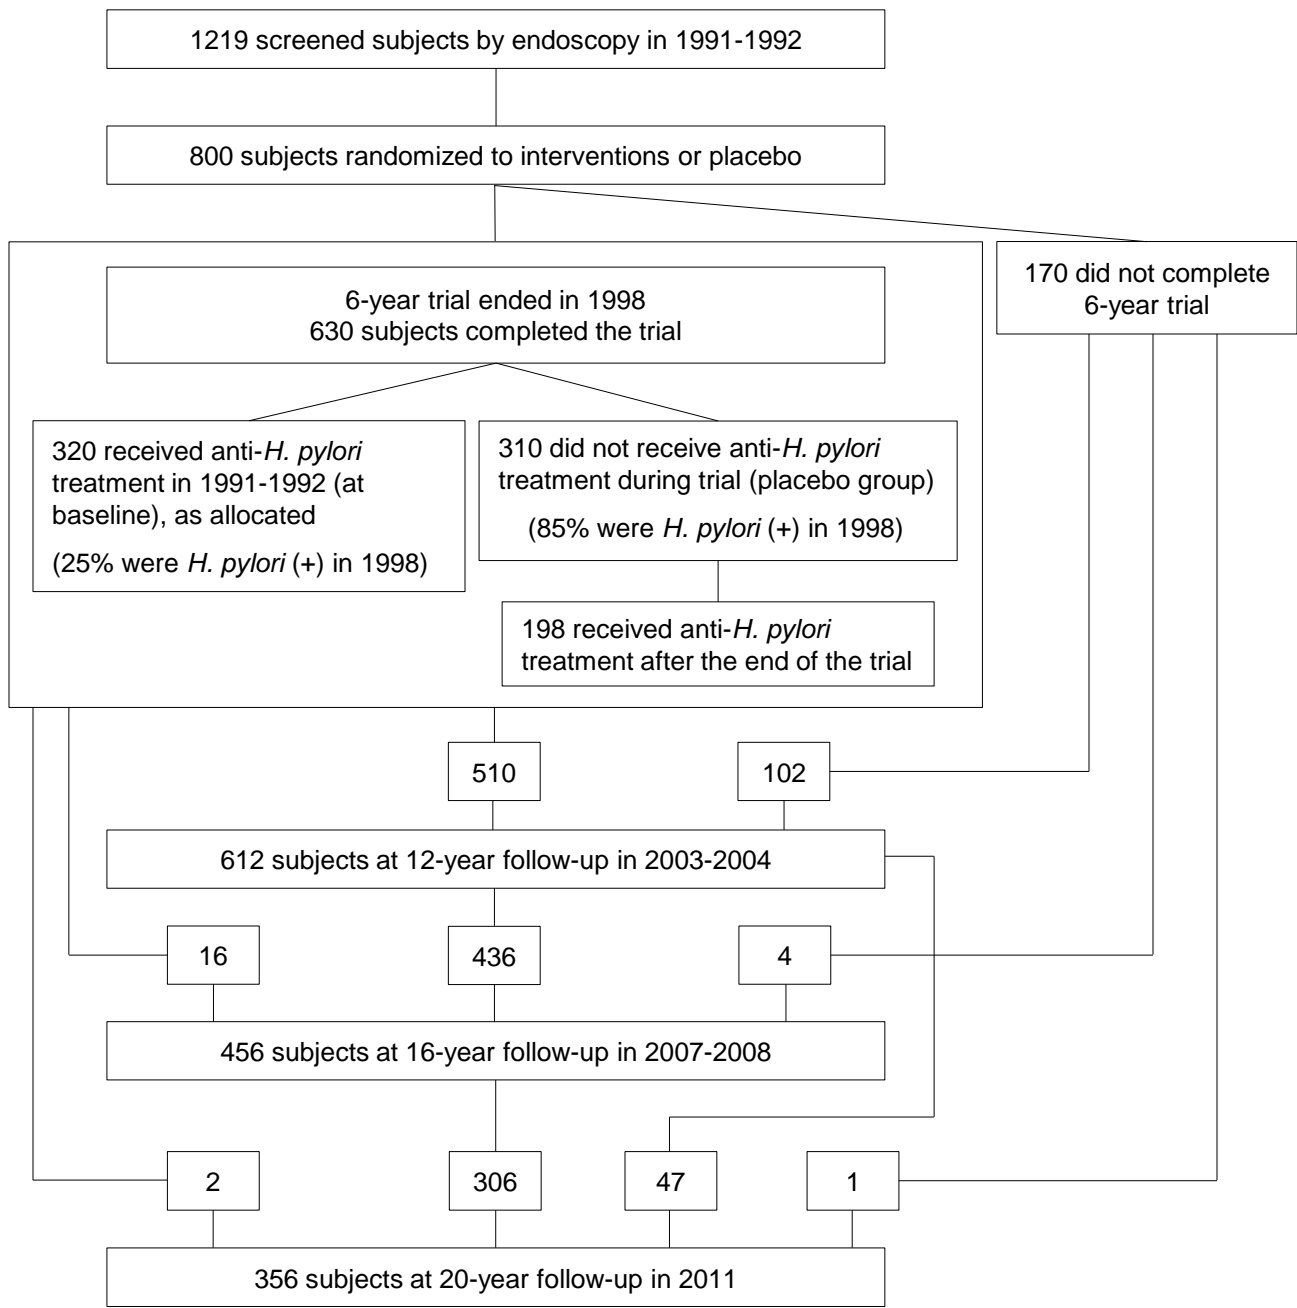

Supplement: NIHMS1647645-supplement-supplemental_figure.pdf [file NIHMS1647645-supplement-supplemental_figure.pdf]
